# Supplementary material for: UHPLC-Q-TOF-MS based serum metabonomics revealed the metabolic perturbations of ischemic stroke and the protective effect of RKIP in rat models
Source: Royal Society of Chemistry journal article supplement (doi:10.1039/c6mb00137h), 2016-04-13
Supplement: c6mb00137h1.pdf [file c6mb00137h1.pdf]

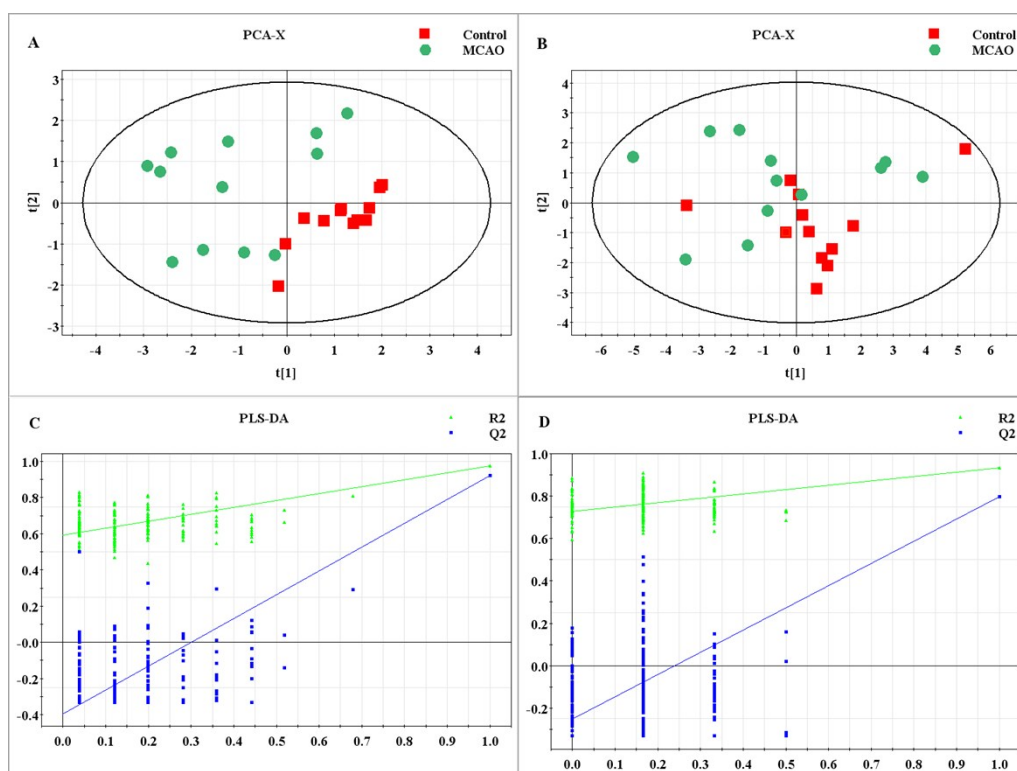

**Figure S1** Plots of multivariate statistical analysis of the experimental group in ESI positive and negative ion mode **(A)** PCA scores plot of the MCAO group and Control group in ESI positive ion mode; **(B)** PCA scores plot of the MCAO group and Control group in ESI negative ion mode; **(C)** Permutation test plot of PLS-DA in ESI positive ion mode; **(D)** Permutation test plot of PLS-DA in ESI negative ion mode;

**Table S1 Potential biomarkers related to ischemic stroke based on lentivirus vectors overexpressing RKIP and their metabolic pathways.**

| No. | M/Z     | RT(min) | VIP    | Ion     | Formula                                                        | Metabolite                                          | Trend <sup>a</sup>         |                                | Pathway                                   | FDR   |
|-----|---------|---------|--------|---------|----------------------------------------------------------------|-----------------------------------------------------|----------------------------|--------------------------------|-------------------------------------------|-------|
|     |         |         |        |         |                                                                |                                                     | $FC(\frac{MCAO}{Control})$ | $FC(\frac{RKIP + MCAO}{MCAO})$ |                                           |       |
| 1   | 248.962 | 0.552   | 1.2270 | [M+Cl]- | C <sub>4</sub> H <sub>7</sub> O <sub>8</sub> P                 | 2-Oxo-3-hydroxy-4-phosphobutanoic acid <sup>d</sup> | 1.21*                      | 1.06                           | Vitamin B6 metabolism                     | 0.026 |
| 2   | 118.083 | 0.646   | 1.5730 | [M+H]+  | C <sub>5</sub> H <sub>11</sub> NO <sub>2</sub>                 | Betaine <sup>c</sup>                                | 1.24**                     | 0.97                           | Glycine, serine and threonine metabolism  | 0.012 |
| 3   | 167.022 | 0.787   | 1.2474 | [M-H]-  | C <sub>5</sub> H <sub>4</sub> N <sub>4</sub> O <sub>3</sub>    | Uric acid <sup>c</sup>                              | 1.31*                      | 1.07                           | Purine metabolism                         | 0.033 |
| 4   | 145.015 | 0.907   | 1.3153 | [M-H]-  | C <sub>5</sub> H <sub>6</sub> O <sub>5</sub>                   | α-Ketoglutarate <sup>c</sup>                        | 0.59**                     | 2.62###                        | TCA cycle                                 | 0.004 |
| 5   | 228.098 | 0.910   | 1.1134 | [M+H]+  | C <sub>9</sub> H <sub>13</sub> N <sub>3</sub> O <sub>4</sub>   | Deoxycytidine <sup>c</sup>                          | 1.45***                    | 0.84###                        | Pyrimidine metabolism                     | 0.008 |
| 6   | 150.059 | 0.910   | 1.5117 | [M+H]+  | C <sub>5</sub> H <sub>11</sub> NO <sub>2</sub> S               | L-Methionine <sup>b</sup>                           | 1.31**                     | 1.07                           | Cysteine and methionine metabolism        | 0.004 |
| 7   | 112.051 | 0.910   | 1.4386 | [M+H]+  | C <sub>4</sub> H <sub>5</sub> N <sub>3</sub> O                 | Cytosine <sup>c</sup>                               | 1.47***                    | 0.87##                         | Pyrimidine metabolism                     | 0.008 |
| 8   | 132.103 | 1.164   | 2.6825 | [M+H]+  | C <sub>6</sub> H <sub>13</sub> NO <sub>2</sub>                 | Isoleucine <sup>c</sup>                             | 1.34**                     | 1.14                           | Valine, leucine and isoleucine metabolism | 0.006 |
|     | 130.087 | 1.165   | 1.7233 | [M-H]-  | C <sub>6</sub> H <sub>13</sub> NO <sub>2</sub>                 | Isoleucine <sup>c</sup>                             | 1.59**                     | 1.23#                          | Valine, leucine and isoleucine metabolism | 0.006 |
| 9   | 166.087 | 1.940   | 2.1316 | [M+H]+  | C <sub>9</sub> H <sub>11</sub> NO <sub>2</sub>                 | L-Phenylalanine <sup>b</sup>                        | 1.45**                     | 1.24                           | Phenylalanine metabolism                  | 0.008 |
|     | 164.072 | 1.936   | 1.7848 | [M-H]-  | C <sub>9</sub> H <sub>11</sub> NO <sub>2</sub>                 | L-Phenylalanine <sup>b</sup>                        | 1.33**                     | 1.16#                          | Phenylalanine metabolism                  | 0.008 |
| 10  | 218.104 | 2.397   | 1.2474 | [M-H]-  | C <sub>9</sub> H <sub>17</sub> NO <sub>5</sub>                 | Pantothenic Acid <sup>c</sup>                       | 1.40**                     | 0.91                           | Alanine metabolism                        | 0.063 |
| 11  | 205.099 | 3.796   | 1.7975 | [M+H]+  | C <sub>11</sub> H <sub>12</sub> N <sub>2</sub> O <sub>2</sub>  | L-Tryptophan <sup>b</sup>                           | 1.34*                      | 1.11                           | Tryptophan metabolism                     | 0.011 |
|     | 203.083 | 3.789   | 1.6484 | [M-H]-  | C <sub>11</sub> H <sub>12</sub> N <sub>2</sub> O <sub>2</sub>  | L-Tryptophan <sup>b</sup>                           | 1.25*                      | 0.93                           | Tryptophan metabolism                     | 0.011 |
| 12  | 212.003 | 4.364   | 1.7278 | [M-H]-  | C <sub>8</sub> H <sub>7</sub> NO <sub>4</sub> S                | Indoxylsulfuric acid <sup>c</sup>                   | 0.62*                      | 1.89#                          | Tryptophan metabolism                     | 0.011 |
| 13  | 666.323 | 5.227   | 2.6091 | [M-H]-  | C <sub>29</sub> H <sub>57</sub> N <sub>5</sub> O <sub>12</sub> | Gluten exorphin C <sup>d</sup>                      | 3.66***                    | 0.23###                        | Tryptophan metabolism                     | 0.011 |

|    |         |        |        |           |                                                                 |                                      |         |         |                         |       |
|----|---------|--------|--------|-----------|-----------------------------------------------------------------|--------------------------------------|---------|---------|-------------------------|-------|
| 14 | 283.084 | 5.345  | 1.5256 | [M+Cl]-   | C <sub>13</sub> H <sub>16</sub> N <sub>2</sub> O <sub>3</sub>   | 6-Hydroxymelatonin <sup>d</sup>      | 0.54*   | 2.20### | Tryptophan metabolism   | 0.011 |
| 15 | 321.045 | 6.513  | 1.4852 | [M-H]-    | C <sub>10</sub> H <sub>15</sub> N <sub>2</sub> O <sub>8</sub> P | 5-Thymidylic acid <sup>d</sup>       | 0.35**  | 1.17    | Pyrimidine metabolism   | 0.008 |
| 16 | 380.257 | 11.350 | 1.2757 | [M+H]+    | C <sub>18</sub> H <sub>38</sub> NO <sub>5</sub> P               | Sphingosine-1-phosphate <sup>c</sup> | 1.32*** | 1.17    | Phospholipid metabolism | 0.011 |
|    | 378.244 | 11.343 | 1.5173 | [M-H]-    | C <sub>18</sub> H <sub>38</sub> NO <sub>5</sub> P               | Sphingosine-1-phosphate <sup>c</sup> | 1.35*   | 1.17    | Phospholipid metabolism | 0.011 |
| 17 | 586.317 | 11.957 | 1.4818 | [M+FA-H]- | C <sub>28</sub> H <sub>48</sub> NO <sub>7</sub> P               | PC(20:5/0:0) <sup>d</sup>            | 2.46*   | 0.93    | Phospholipid metabolism | 0.011 |
| 18 | 619.291 | 12.323 | 1.3220 | [M+Cl]-   | C <sub>30</sub> H <sub>48</sub> O <sub>11</sub>                 | Cholic acid glucuronide <sup>d</sup> | 1.34*   | 1.51##  | sucrose metabolism      | 0.033 |
| 19 | 544.345 | 12.959 | 1.7226 | [M+H]+    | C <sub>28</sub> H <sub>50</sub> NO <sub>7</sub> P               | PC(20:4/0:0) <sup>d</sup>            | 0.85*   | 0.68### | Phospholipid metabolism | 0.011 |
| 20 | 496.344 | 13.147 | 2.5269 | [M+H]+    | C <sub>24</sub> H <sub>50</sub> NO <sub>7</sub> P               | PC(16:0/0:0) <sup>c</sup>            | 0.86*** | 1.08##  | Phospholipid metabolism | 0.011 |
|    | 530.304 | 13.142 | 1.5233 | [M+Cl]-   | C <sub>24</sub> H <sub>50</sub> NO <sub>7</sub> P               | PC(16:0/0:0) <sup>c</sup>            | 0.83*   | 1.17    | Phospholipid metabolism | 0.011 |
| 21 | 522.359 | 14.066 | 1.7145 | [M+H]+    | C <sub>26</sub> H <sub>52</sub> NO <sub>7</sub> P               | PC(0:0/18:1) <sup>d</sup>            | 0.85*   | 0.86#   | Phospholipid metabolism | 0.011 |
| 22 | 433.238 | 14.111 | 1.5997 | [M-H]-    | C <sub>21</sub> H <sub>39</sub> O <sub>7</sub> P                | LPA(0:0/18:2) <sup>d</sup>           | 0.71**  | 0.77##  | Glycerolipid metabolism | 0.024 |
| 23 | 457.238 | 14.160 | 2.2095 | [M+FA-H]- | C <sub>18</sub> H <sub>39</sub> NO <sub>7</sub> P               | LysoPC(10:0) <sup>d</sup>            | 0.65*** | 0.63### | Phospholipid metabolism | 0.011 |
| 24 | 400.343 | 14.351 | 1.0367 | [M+H]+    | C <sub>23</sub> H <sub>45</sub> NO <sub>4</sub>                 | L-Palmitoylcarnitine <sup>c</sup>    | 0.76*   | 1.32##  | Fatty acid metabolism   | 0.009 |
| 25 | 282.282 | 16.992 | 1.4505 | [M+H]+    | C <sub>18</sub> H <sub>35</sub> NO                              | Oleamide <sup>c</sup>                | 0.47**  | 1.66    | Fatty acid metabolism   | 0.009 |
| 26 | 255.234 | 17.712 | 1.8568 | [M-H]-    | C <sub>16</sub> H <sub>32</sub> O <sub>2</sub>                  | Palmitic acid <sup>d</sup>           | 1.11**  | 1.17#   | Fatty acid metabolism   | 0.009 |
| 27 | 281.249 | 17.883 | 1.6319 | [M-H]-    | C <sub>18</sub> H <sub>34</sub> O <sub>2</sub>                  | Vaccenic acid <sup>d</sup>           | 0.52*   | 1.52    | Fatty acid metabolism   | 0.009 |

<sup>a</sup>(FC>1): up-regulate and (FC<1): down-regulate; (\* p < 0.05, \*\* p < 0.01, \*\*\*p < 0.001 versus control group; # p < 0.05, ## p < 0.01, ###p < 0.001 versus MCAO group)

<sup>b</sup>:The metabolites were verified by standard compound.

<sup>c</sup>: Metabolites analyzed based on MS/MS chromatograms.

<sup>d</sup>: Metabolites putatively annotation.
